# Supplementary material for: Inhibitors of Rho kinase (ROCK) signaling revert the malignant phenotype of breast cancer cells in 3D context
Source: PubMed Central journal article supplement (PMC5077963; doi:10.18632/oncotarget.9395), 2016-05-17
Supplement: oncotarget-07-31602-s001.pdf [file oncotarget-07-31602-s001.pdf]

# Inhibitors of Rho kinase (ROCK) signaling revert the malignant phenotype of breast cancer cells in 3D context

## Supplementary Material

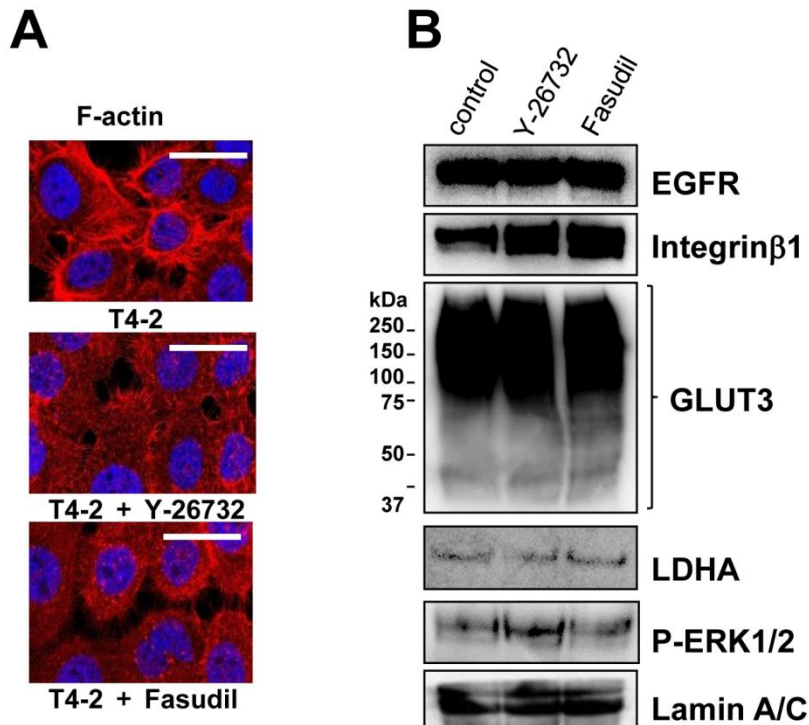

**Fig. S1.** Absence of down-regulation by inhibition of ROCK in T4-2 cells in monolayer culture. (A) Confocal immunofluorescence of F-actin in T4-2 cells treated with ROCK inhibitor (Y-26732 or Fasudil, 30  $\mu$ M). Images were obtained using Alexa Fluor-conjugated phalloidin (F-actin; Red, Nuclei; Blue). Scale bars: 10  $\mu$ m. (B) Protein expression of EGFR, Integrin $\beta$ 1, GLUT3, LDHA, P-ERK1/2 and Lamin A/C. Total cell lysates were analyzed by Western blotting with their specific antibodies.

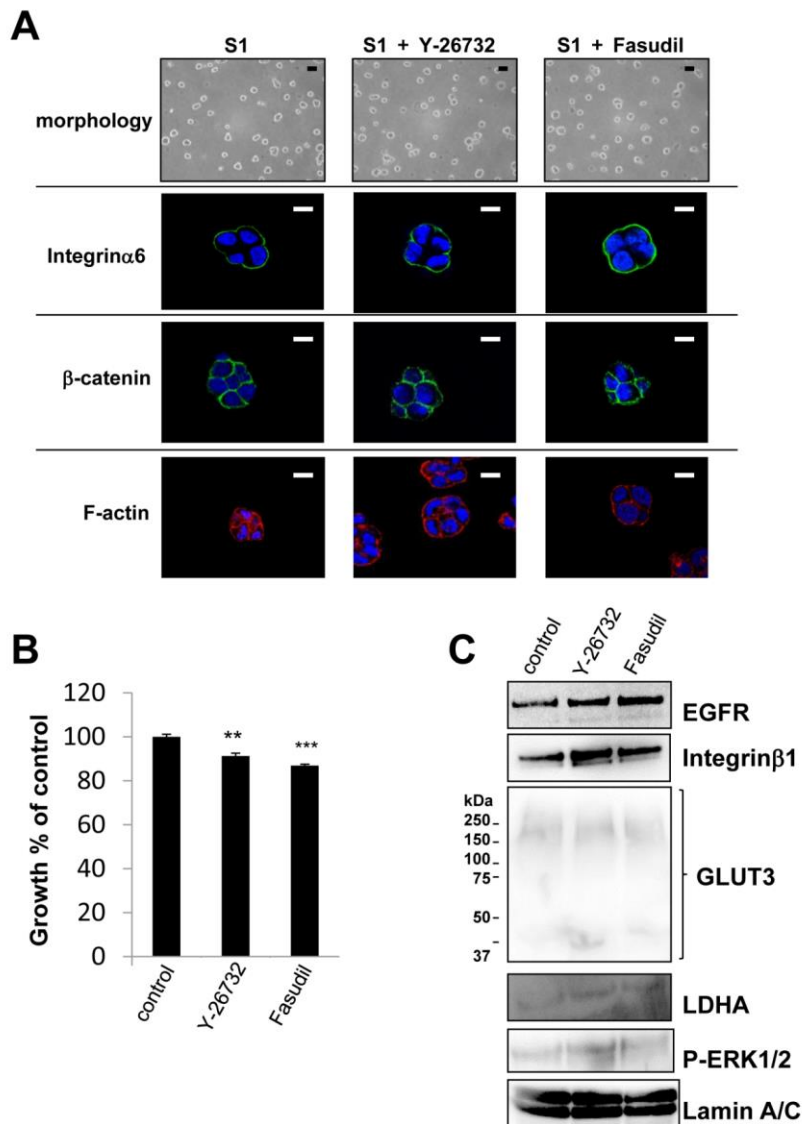

**Fig. S2.** Effects of inhibition of ROCK on nonmalignant S1 cells in 3D IrECM. (A) Morphological alternations and confocal immunofluorescence images of S1 cells treated with ROCK inhibitor (Y-26732 or Fasudil, 30  $\mu$ M). Their images were obtained using their specific antibodies or Alexa Fluor-conjugated phalloidin (Integrin $\alpha$ 6; Green,  $\beta$ -catenin; Green, F-actin; Red, Nuclei; Blue). Black scale bars: 20  $\mu$ m, White scale bars: 10  $\mu$ m. (B) Proliferation of S1 cells treated with ROCK inhibitor (Y-26732 or Fasudil, 30  $\mu$ M). Cell viability was assessed by MTT assay. Values represent means  $\pm$  SE of four determinations. \*\* $P < 0.01$ , \*\*\* $P < 0.001$  compared with vehicle control group (Student's t). (C) Protein expression of EGFR, Integrin $\beta$ 1, GLUT3, LDHA, P-ERK1/2, Lamin A/C. Total cell lysates were analyzed by Western blotting with their specific antibodies.

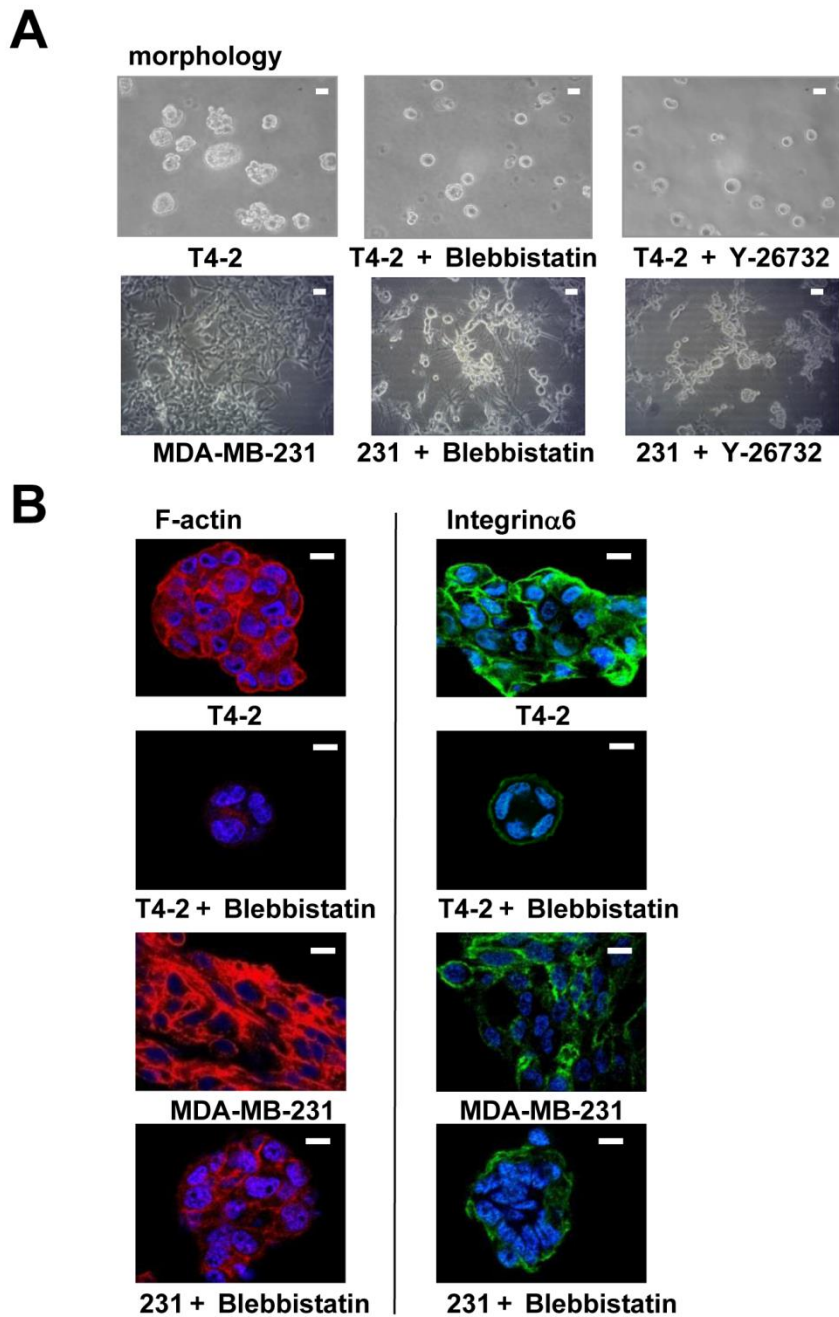

**Fig. S3.** Effects of Blebbistatin, a Myosin II ATPase inhibitor, on T4-2 or MDA-MB-231 cells in 3D IrECM. (A) Morphological alternations and (B) confocal immunofluorescence images of T4-2 or MDA-MB-231 cells treated with Blebbistatin (20  $\mu$ M) or Y-26732 (30  $\mu$ M). Their images were obtained using anti-integrin $\alpha$ 6 antibody or Alexa Fluor-conjugated phalloidin (integrin $\alpha$ 6; Green, F-actin; Red, Nuclei; Blue). Scale bars: 20  $\mu$ m (A), 10  $\mu$ m. (B).

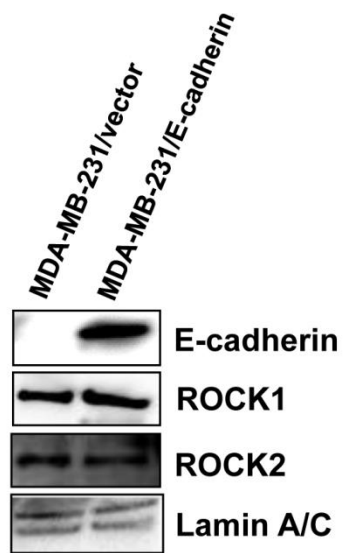

**Fig. S4.** Protein expression of E-cadherin, ROCK1, ROCK2 and Lamin A/C in vector-or E-cadherin-expressing MDA-MB-231 cells. Total cell lysates were analyzed by Western blotting with their specific antibodies.
